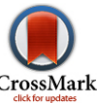

## Correction

# Correction: Clinical Efficacy and Safety of Nerve-Sparing Radical Hysterectomy for Cervical Cancer: A Systematic Review and Meta-Analysis

The *PLOS ONE* Staff

## Notice of Republication

This article was republished on May 27, 2014, to include Checklist S1, the PRISMA checklist, which was mistakenly omitted during the production process. The publisher apologizes for the error. Please download this article again to view the correct version. The originally published, uncorrected article and the republished, corrected article are provided here for reference.

## Supporting Information

**File S1.** Originally published, uncorrected article.  
(PDF)

**File S2.** Republished, corrected article.  
(PDF)

## Reference

1. Long Y, Yao D-s, Pan X-w, Ou T-y (2014) Clinical Efficacy and Safety of Nerve-Sparing Radical Hysterectomy for Cervical Cancer: A Systematic Review and Meta-Analysis. *PLoS ONE* 9(4): e94116. doi:10.1371/journal.pone.0094116

**Citation:** The *PLOS ONE* Staff (2014) Correction: Clinical Efficacy and Safety of Nerve-Sparing Radical Hysterectomy for Cervical Cancer: A Systematic Review and Meta-Analysis. *PLoS ONE* 9(6): e101068. doi:10.1371/journal.pone.0101068

**Published:** June 24, 2014

**Copyright:** © 2014 The *PLOS ONE* Staff. This is an open-access article distributed under the terms of the Creative Commons Attribution License, which permits unrestricted use, distribution, and reproduction in any medium, provided the original author and source are credited.
